# Supplementary material for: One pot synthesis of Zr–carboxylate porous hybrid materials: orthogonal C–C heterocoupling and carboxylate–Zr assembly
Source: Royal Society of Chemistry journal article supplement (doi:10.1039/c6ra07769b), 2016-01-01
Supplement: c6ra07769b1.pdf [file c6ra07769b1.pdf]

# One Pot Synthesis of Zr-Carboxylate Porous Hybrid Materials: Orthogonal C–C Heterocoupling and Carboxylate-Zr Assembly

Rana R. Haikal, Ahmed M. Elmansi, Poussy Ali, Youssef S. Hassan, and Mohamed H. Alkordi†\*

†Zewail City for Science and Technology, Center for Materials Science, Sheikh Zayed District, 12588 Giza, Egypt.

## Contents

|                                                                                                                                                                                                   |    |
|---------------------------------------------------------------------------------------------------------------------------------------------------------------------------------------------------|----|
| Experimental Procedures .....                                                                                                                                                                     | 3  |
| Compound 1 .....                                                                                                                                                                                  | 4  |
| Figure S1. ATR-FTIR spectrum of 4-ethynylbenzoic acid and 1.....                                                                                                                                  | 5  |
| Figure S2. N <sub>2</sub> sorption isotherm of 1.....                                                                                                                                             | 6  |
| Figure S3. Pore size distribution in 1. ....                                                                                                                                                      | 6  |
| Figure S4. Variable temperature CO <sub>2</sub> isotherms in 1.....                                                                                                                               | 7  |
| Figure S5. Isosteric heat of adsorption for CO <sub>2</sub> in 1.....                                                                                                                             | 7  |
| Figure S6: SEM image and Energy-dispersive X-ray spectroscopy (EDX) for 1 and maps showing the color coded images of the overall elemental distribution, and elemental microanalysis table.....   | 9  |
| Compound 2 .....                                                                                                                                                                                  | 10 |
| Figure S8. Pore size distribution in 2. ....                                                                                                                                                      | 11 |
| Figure S9. Variable temperature CO <sub>2</sub> isotherms in 2.....                                                                                                                               | 12 |
| Figure S10. Isosteric heat of adsorption for CO <sub>2</sub> in 2.....                                                                                                                            | 12 |
| Figure S 11: SEM image and Energy-dispersive X-ray spectroscopy (EDX) for 2 and maps showing the color coded images of the overall elemental distribution, and elemental microanalysis table..... | 14 |
| Figure S12 : <sup>13</sup> C-CPMAS NMR spectrum of 2 .....                                                                                                                                        | 15 |
| Compound 3 .....                                                                                                                                                                                  | 16 |
| Figure S13. N <sub>2</sub> sorption isotherm of 3.....                                                                                                                                            | 17 |
| Figure S14. Pore size distribution in 3. ....                                                                                                                                                     | 17 |
| Figure S 15 SEM image and Energy-dispersive X-ray spectroscopy (EDX) for 3 and maps showing the color coded images of the overall elemental distribution, and elemental microanalysis table.....  | 19 |
| Figure S16 : <sup>13</sup> C-CPMAS NMR spectrum of 3 .....                                                                                                                                        | 20 |
| Compound 4 .....                                                                                                                                                                                  | 21 |
| Figure S17: N <sub>2</sub> gas sorption isotherms in 4. ....                                                                                                                                      | 22 |

|                                                                                                                                                                                                   |    |
|---------------------------------------------------------------------------------------------------------------------------------------------------------------------------------------------------|----|
| Figure S18. Pore size distribution in 4. ....                                                                                                                                                     | 22 |
| Figure S19. Variable temperature CO <sub>2</sub> isotherms in 4. ....                                                                                                                             | 23 |
| Figure S20. Isosteric heat of adsorption for CO <sub>2</sub> in 4. ....                                                                                                                           | 23 |
| Figure S21 : <sup>13</sup> C-CPMAS NMR spectrum of 4 .....                                                                                                                                        | 26 |
| Compound 5 .....                                                                                                                                                                                  | 27 |
| Figure S22: N <sub>2</sub> gas sorption isotherms in 5. ....                                                                                                                                      | 28 |
| Figure S23. Pore size distribution in 5. ....                                                                                                                                                     | 28 |
| Figure S24. Variable temperature CO <sub>2</sub> isotherms in 5. ....                                                                                                                             | 29 |
| Figure S25. Isosteric heat of adsorption for CO <sub>2</sub> in 5. ....                                                                                                                           | 29 |
| Figure S 26: SEM image and Energy-dispersive X-ray spectroscopy (EDX) for 5 and maps showing the color coded images of the overall elemental distribution, and elemental microanalysis table..... | 31 |
| Figure S27 : <sup>13</sup> C-CPMAS NMR spectrum of 5 .....                                                                                                                                        | 32 |
| Figure S28: X-ray powder diffraction patterns for compounds 1-5. ....                                                                                                                             | 33 |

## Experimental Procedures

All reagents were used as received without further purification. Solvents, catalysts, and common chemicals were purchased from Sigma-Aldrich or Fisher Scientific-UK. Brominated aromatics were purchased from Combi-Blocks. Nitrogen and CO<sub>2</sub> gases for sorption were purchased from Airliquide (N<sub>2</sub> AlphaGaz2 (99.999%) and CO<sub>2</sub> (99.995%)). Gas sorption analysis was performed on Micromeritics **ASAP2020** and the variable temperature CO<sub>2</sub> isotherms were recorded in insulated dewar connected to **LAUDA RA-8** circulating chiller. The apparent surface areas were determined from the nitrogen adsorption isotherms collected at 77 K by applying the Brunauer-Emmett-Teller (BET) and Langmuir models. Pore size analyses were performed using a slit NLDFT pore model system by assuming a carbon finite pores surface. The determination of the isosteric heats of adsorption (Q<sub>st</sub>) for CO<sub>2</sub> was estimated by applying the Clausius-Clapeyron expression using the sorption isotherms measured at variable temperatures.

Infra-red absorption spectra were recorded on ThermoScientific **Nicolet is-10**. Synthetic reactions were performed under nitrogen atmosphere in oven-dried glassware

For comparative analysis we run the solid state NMR spectra under the sample experimental and instrumental conditions. All NMR experiments were conducted using a 400 MHz SS NMR AVANCE III spectrometer. <sup>13</sup>C CP MAS NMR spectra were recorded at a resonance frequency of 100.622 MHz under 12 kHz spinning rate using a triple-resonance 4 mm Bruker MAS probe (BrukerBioSpin, Rheinstetten, Germany). The temperature for all experiments was maintained at 298 K. The cross-polarization CP contact time was set to 2 ms employing ramp100 for variable amplitude CP. To achieve a sufficient signal-to-noise ratio in a reasonable amount of time, 12 k transients and 24 k were collected with 7 s recycle delay. Exponential line broadening of 10 Hz applied before Fourier Transformation. Bruker Topspin 3.0 software was used for data collection and for spectral analysis.

**SEM images** were recorded on FEI-NovaNano SEM 450 equipped with EDAX - Octane Silicon Drift Detector, TEAM™ EDS Analysis Systems for EDX analysis.

## Compound 1

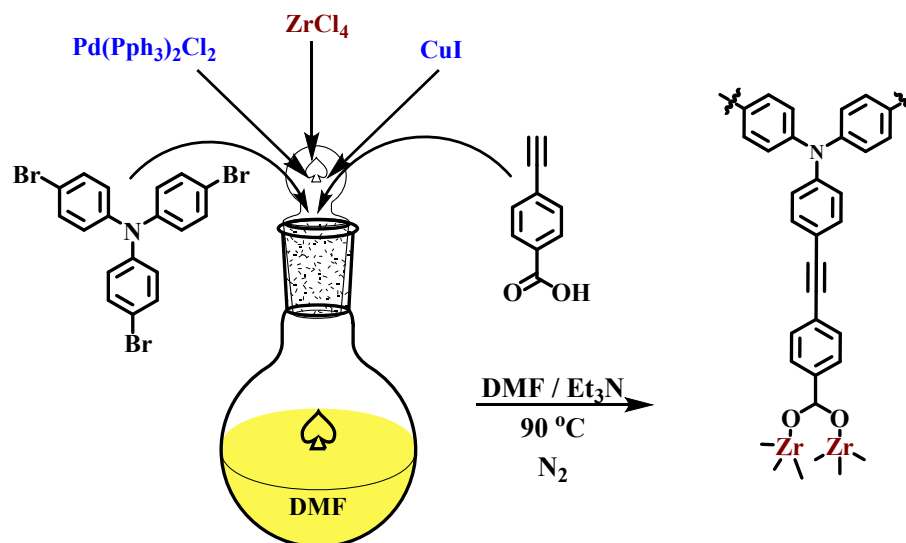

In a glass pressure vessel fitted with teflon screw cap (50 mL) charged with a magnetic stirrer a solution of **4-ethynylbenzoic acid** (0.5 mmol, 0.073 g) in **DMF** (15 mL) was prepared and **ZrCl<sub>4</sub>** (0.25 mmol, 0.0583 g) was then added to the solution and the solution stirred for 1 hour at room temperature (solution turns from clear red to fluorescent orange-red upon addition of the  $\text{ZrCl}_4$ ). To this solution was then added **Et<sub>3</sub>N** (5 mL) and the vessel was capped with silicon septum, and the solution was degassed through three freeze-pump-thaw cycles and backfilled with nitrogen. To this solution and under nitrogen atmosphere was added **tris-(4-bromophenyl)-amine** (0.165 mmol, 0.079 g), **bis-(triphenylphosphine)palladium(II) dichloride** (0.014 mmol, 10 mg), **CuI** (0.04 mmol, 5 mg) and **triphenylphosphine** (0.02 mmol, 5 mg) and the flask was then evacuated/backfilled with nitrogen and sealed and the mixture was stirred at  $90^\circ\text{C}$  for 24 h to result in yellow-colored precipitate. The reaction vessel was then cooled to room temperature, opened to air and the solid filtered through a fritted funnel, washed with DCM/DMF and kept under Acetonitrile for guest exchange for one week prior to gas sorption measurements. Activation for gas sorption included evacuation under dynamic vacuum at  $90^\circ\text{C}$  for 4 hours followed by ramping to  $100^\circ\text{C}$  and degassing for additional 6 hours. Note: upon degassing the sample changed color from faint yellow to deep brown. Total dry weight of the product was 0.1053 g, 78% yield based on the sum of masses for reactants excluding counterions and bromine atoms.

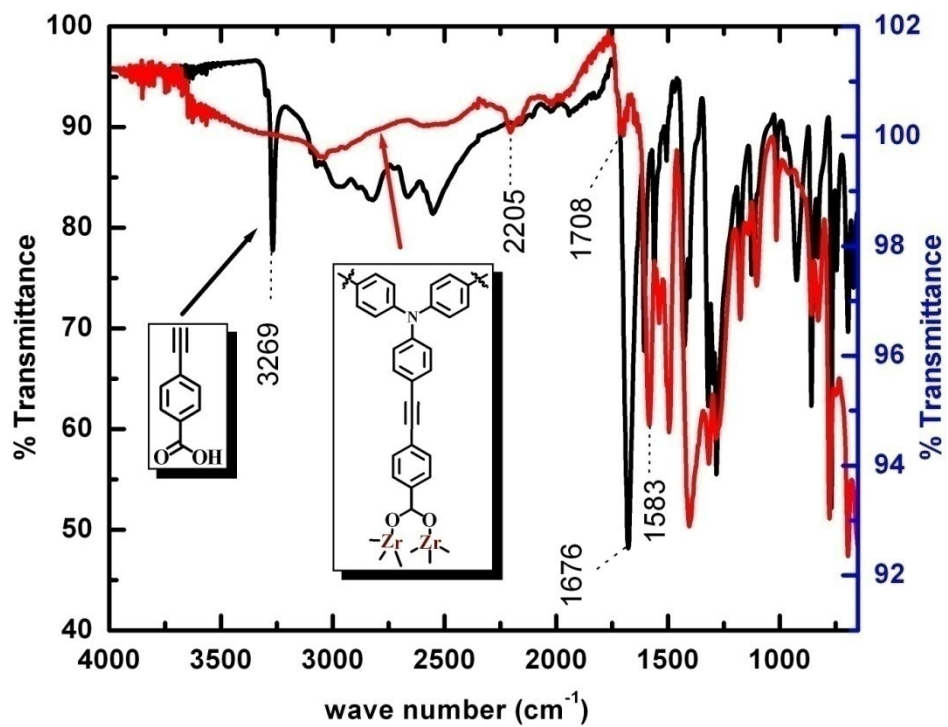

Figure S1. ATR-FTIR spectrum of 4-ethynylbenzoic acid and 1.

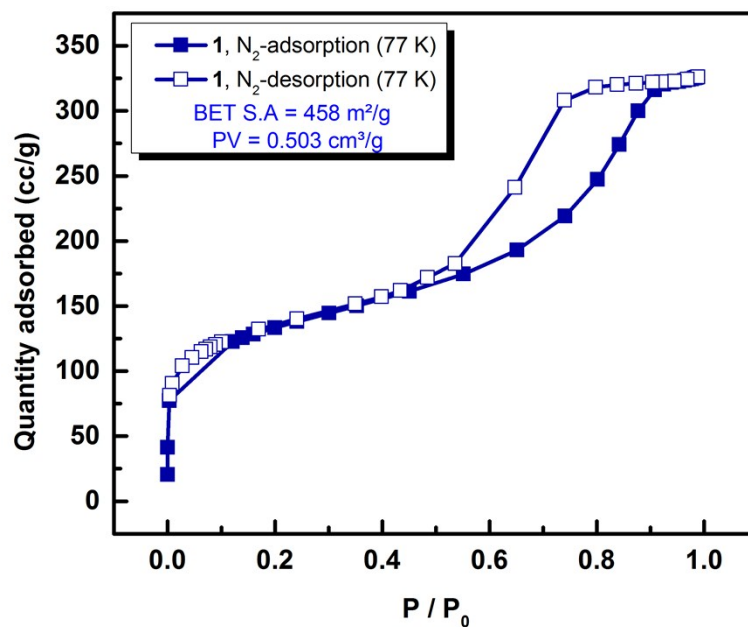

Figure S2. N<sub>2</sub> sorption isotherm of 1.

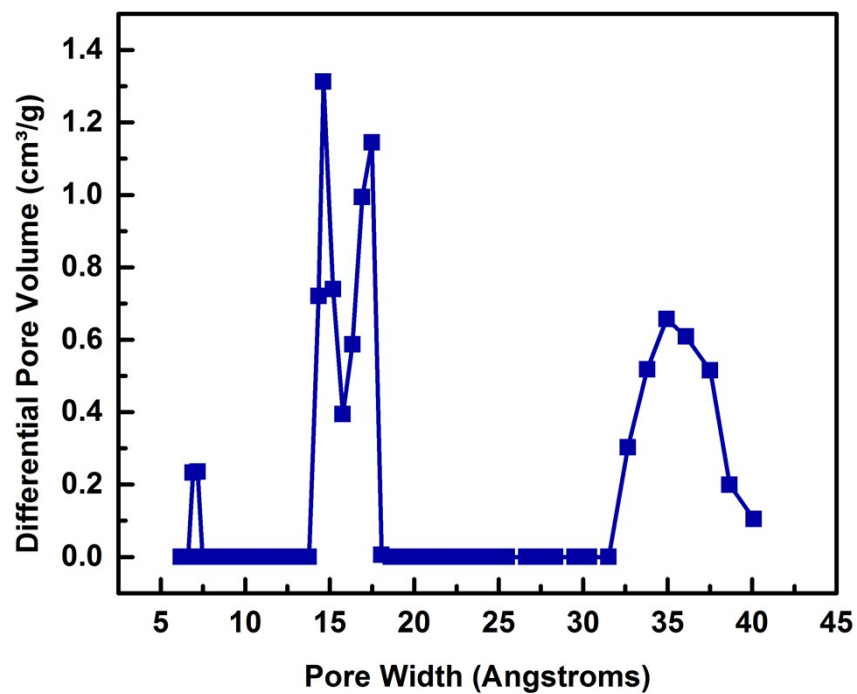

Figure S3. Pore size distribution in 1.

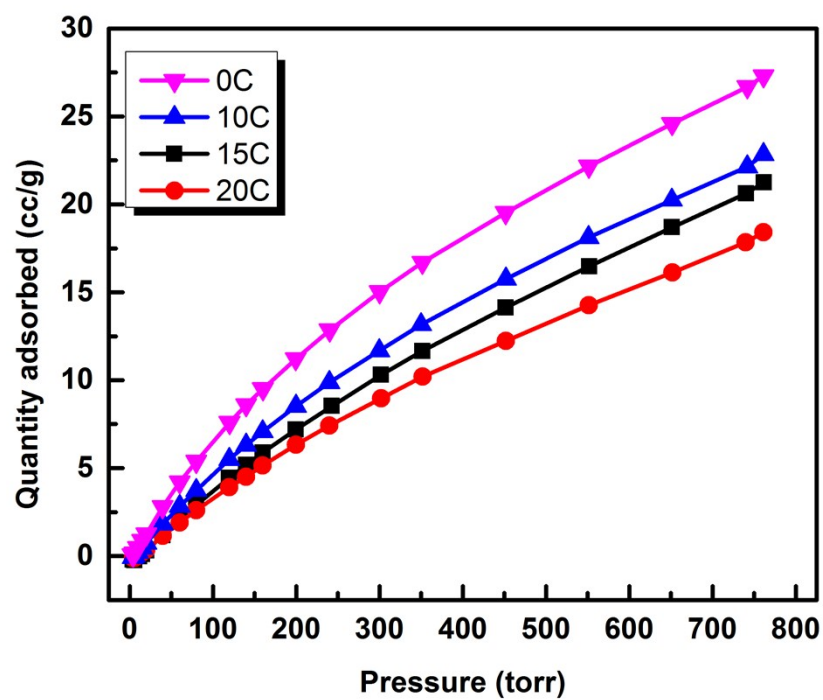

Figure S4. Variable temperature CO<sub>2</sub> isotherms in 1.

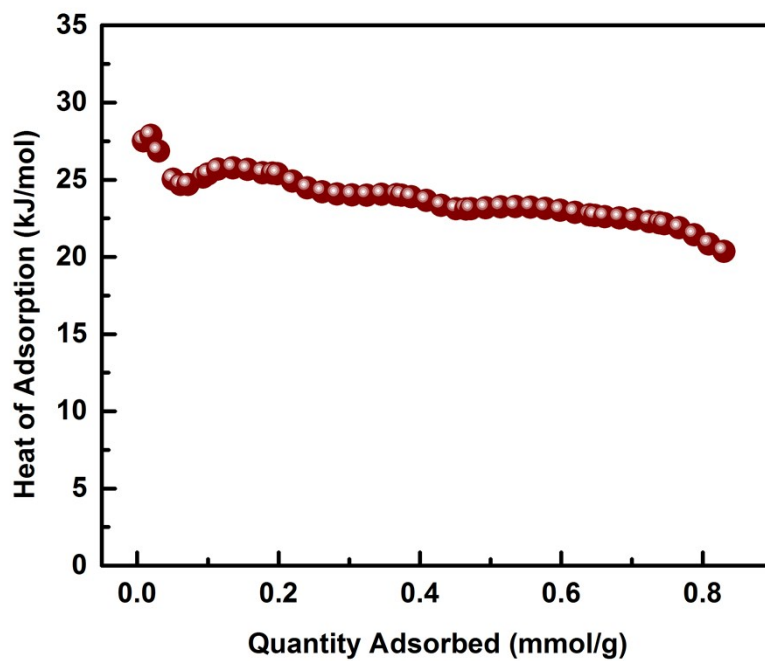

Figure S5. Isosteric heat of adsorption for CO<sub>2</sub> in 1.

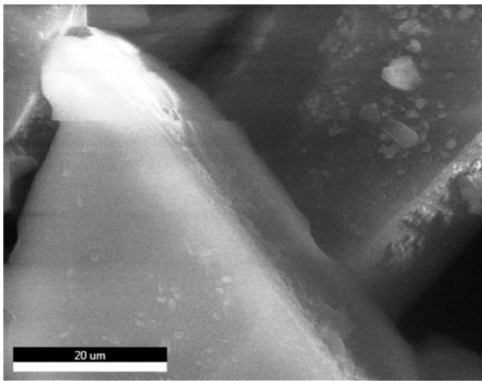

Image

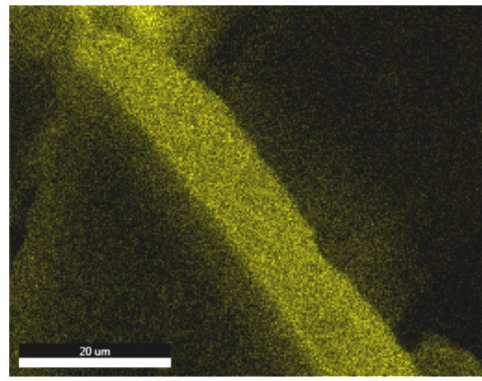

C K

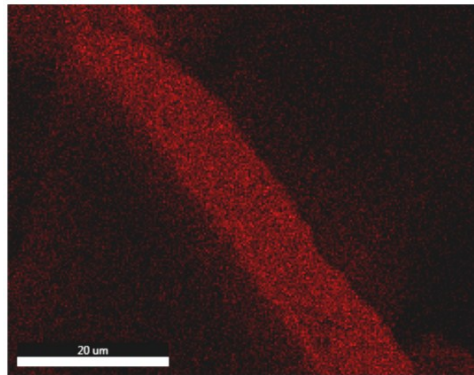

O K

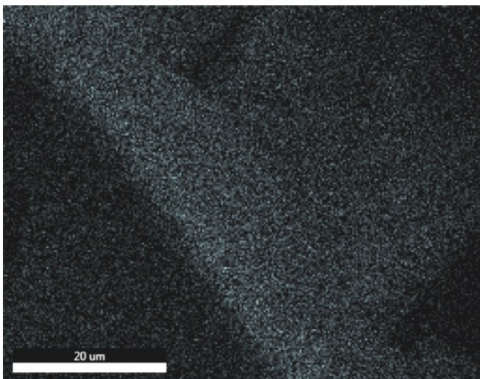

BrK

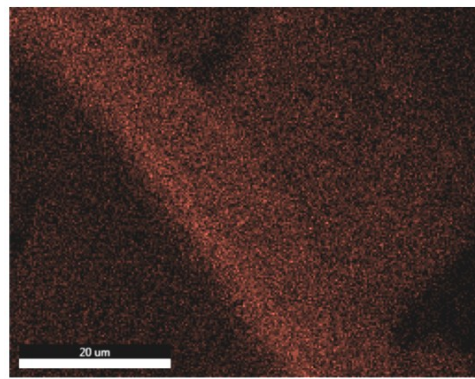

ZrK

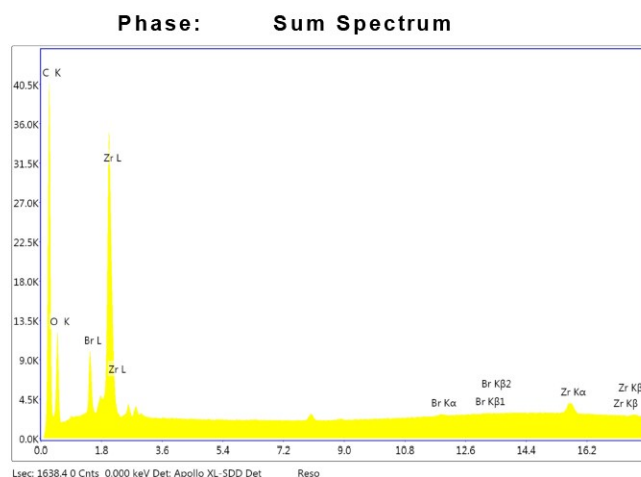

**eZAF Smart Quant Results**

| Element | Weight % | Atomic % | Net Int. | Net Int. Error |
|---------|----------|----------|----------|----------------|
| C K     | 68.06    | 79.12    | 190.2    | 0              |
| O K     | 22.19    | 19.36    | 46.8     | 0.01           |
| BrL     | 1.42     | 0.25     | 27.2     | 0.01           |
| ZrL     | 8.32     | 1.27     | 196.3    | 0              |

Figure S6: SEM image and Energy-dispersive X-ray spectroscopy (EDX) for 1 and maps showing the color coded images of the overall elemental distribution, and elemental microanalysis table

## Compound 2

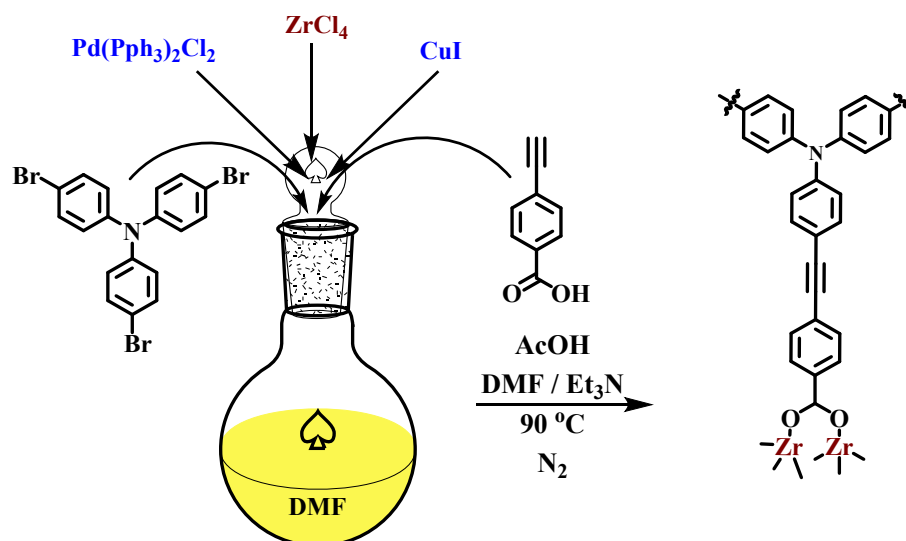

In a glass pressure vessel fitted with teflon screw cap (100 mL) charged with a magnetic stirrer a solution of  $\text{ZrCl}_4$  (0.25 mmol, 0.0583 g) in  $\text{DMF}$  (10 mL) was prepared and to this solution was added **glacial acetic acid** (0.1 mL, 1.66 mmol). After stirring at  $90^\circ\text{C}$  for 1 hr, was then added  $\text{Et}_3\text{N}$  (5 mL), and the vessel was capped with silicon septum, and the solution was degassed through three freeze-pump-thaw cycles and backfilled with nitrogen. To this solution and under nitrogen atmosphere was added **4-ethynylbenzoic acid** (0.5 mmol, 0.073 g), **tris-(4-bromophenyl)-amine** (0.165 mmol, 0.079 g), **bis-(triphenylphosphine) palladium(II) dichloride** (0.014 mmol, 10 mg),  $\text{CuI}$  (0.04 mmol, 5 mg) and **triphenylphosphine** (0.02 mmol, 5 mg) and the flask was then evacuated/backfilled with nitrogen and sealed and the mixture was stirred at  $90^\circ\text{C}$  for 24 h to result in yellow-colored precipitate. The reaction vessel was then cooled to room temperature, opened to air and the solid filtered through a fritted funnel, washed with Water/DCM/DMF/Acetone and kept under Acetonitrile for guest exchange for one week prior to gas sorption measurements. Activation for gas sorption included evacuation under dynamic vacuum at  $120^\circ\text{C}$  for 6 hours. Total dry weight of the product was 0.0723 g, 54% yield based on the sum of masses for reactants excluding counterions and bromine atoms.

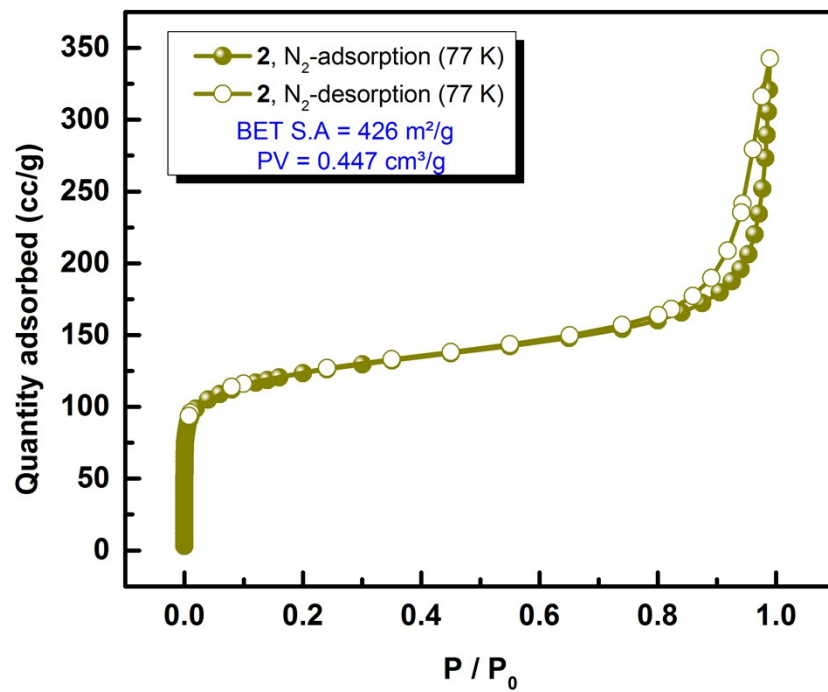

Figure S7. N<sub>2</sub> sorption isotherm of 2

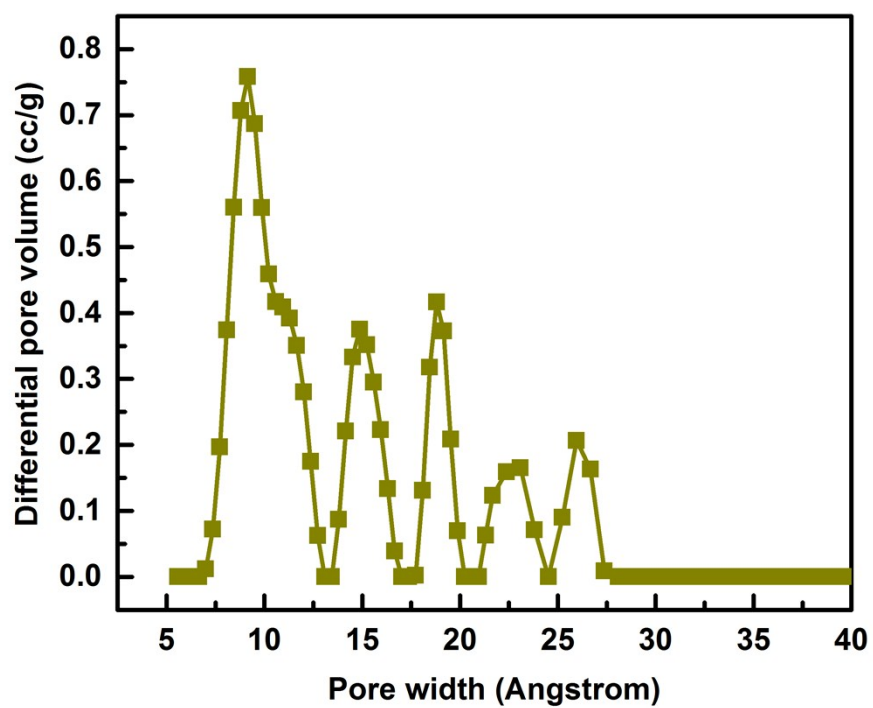

Figure S8. Pore size distribution in 2.

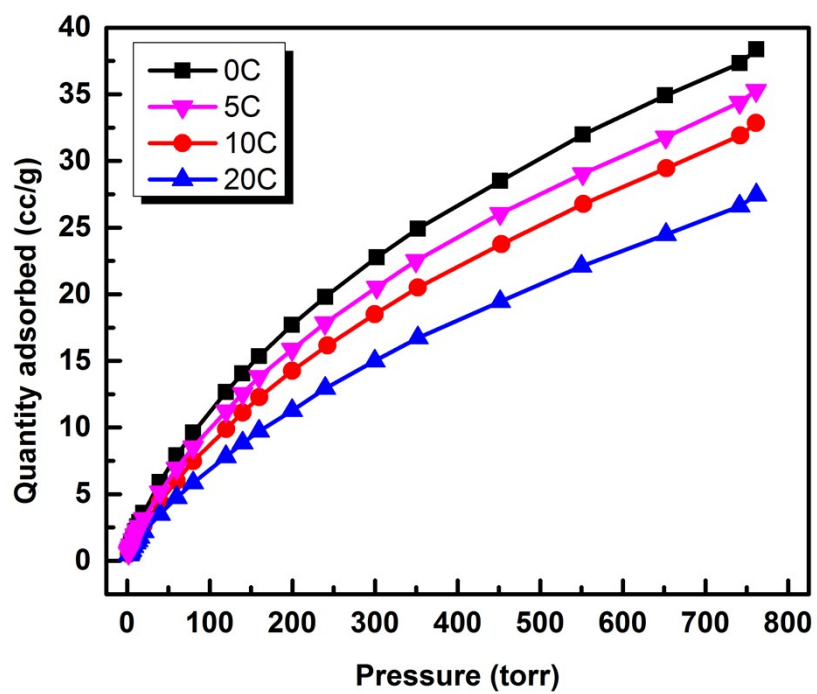

Figure S9. Variable temperature CO<sub>2</sub> isotherms in 2.

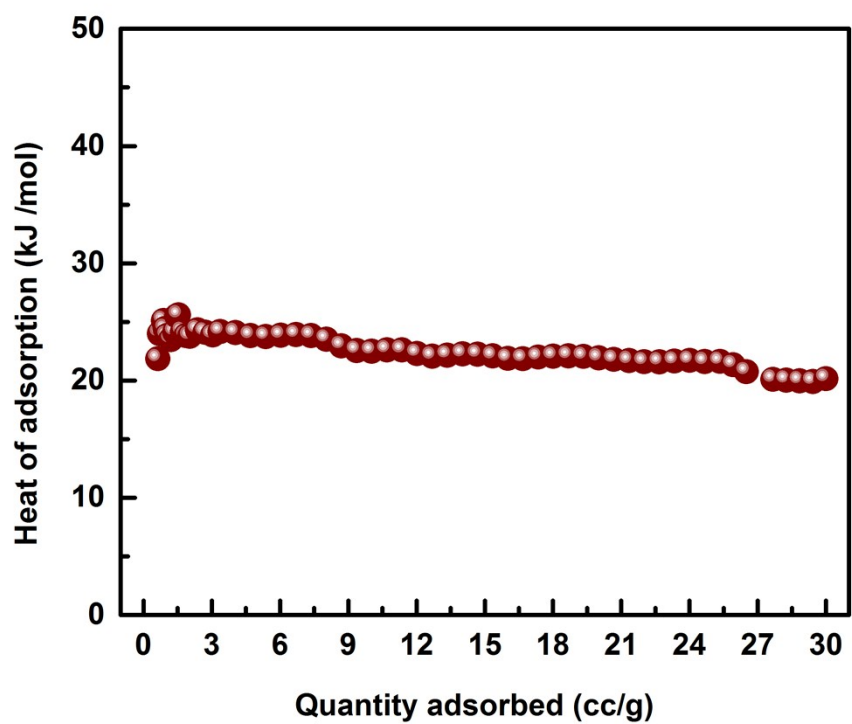

Figure S10. Isosteric heat of adsorption for CO<sub>2</sub> in 2.

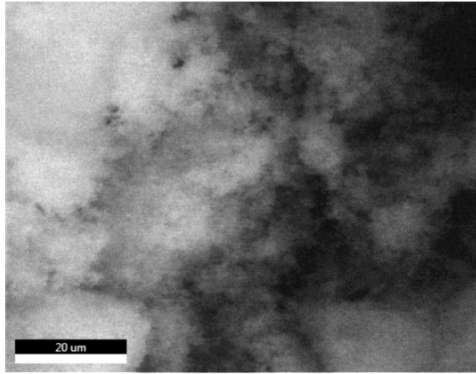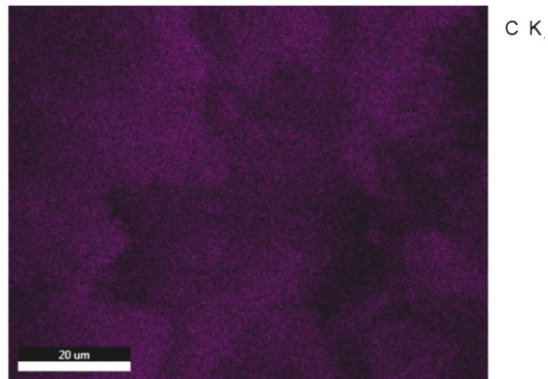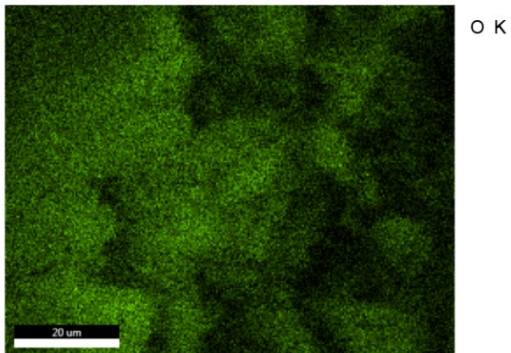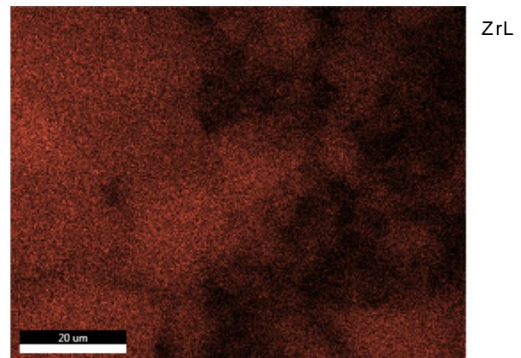

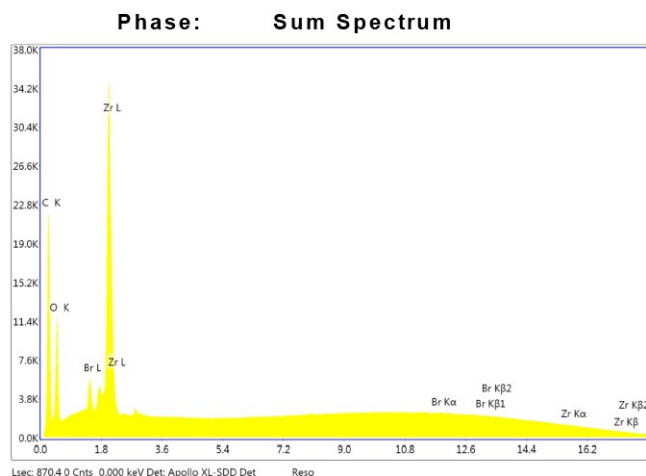

**eZAF Smart Quant Results**

| Element | Weight % | Atomic % | Net Int. | Net Int. Error |
|---------|----------|----------|----------|----------------|
| C K     | 55.24    | 70.9     | 214.5    | 0              |
| O K     | 27.08    | 26.09    | 113.9    | 0              |
| Br L    | 0.9      | 0.17     | 19.8     | 0.03           |
| Zr L    | 16.77    | 2.83     | 356.9    | 0              |

Figure S 11: SEM image and Energy-dispersive X-ray spectroscopy (EDX) for 2 and maps showing the color coded images of the overall elemental distribution, and elemental microanalysis table.

MA\_129

MAS 20kHz  
CP with 2msec contact  
SPINAL64 decoupling @ 147kHz

Current Data Parameters  
NAME alkordi\_160125  
EXPMO 2  
PROCNO 1

F2 - Acquisition Parameters  
Date 20160125  
Time 13.49 h  
INSTRUM spect  
PROBHD W134610\_0001 (   
PULPROG cp  
TD 3742  
SOLVENT MeOD  
NS 820  
DS 0  
SWH 62500.000 Hz  
FIDRES 16.702239 Hz  
AQ 0.0299360 sec  
RG 199.22  
DM 8.000 usec  
DE 7.48 usec  
TE 0 K  
D1 2.00000000 sec  
ZGPGTNS  
SFO1 125.7904823 MHz  
NUC1 13C  
P15 2000.00 usec  
PLW1 36.00000000 W  
SFO2 500.2117507 MHz  
NUC2 1H  
CNST21 1.0000000  
CPDPRG2 spinal64  
P3 1.70 usec  
PCPD2 3.40 usec  
PLW2 0 W  
PLW12 42.00000000 W  
SPNAM[0] ramp70100.100  
SFOAL0 0.500  
SPOFFS0 0 Hz  
SPW0 24.00000000 W

F2 - Processing parameters  
SI 8192  
SF 125.7779945 MHz  
WDW EM  
SSB 0  
LB 125.00 Hz  
GB 0  
PC 1.40

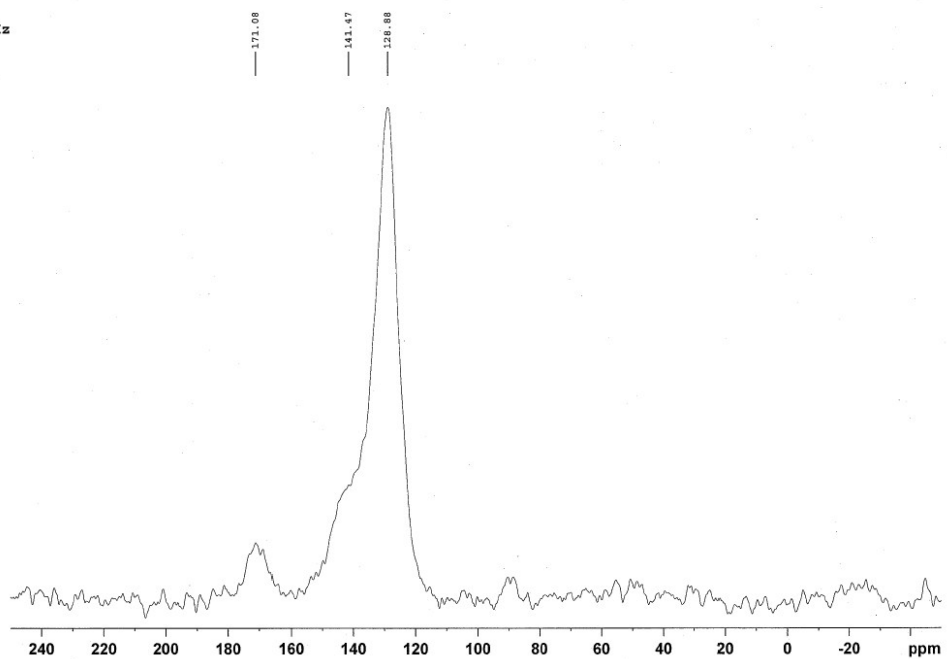

Figure S12 : 13C-CPMAS NMR spectrum of 2

### Compound 3

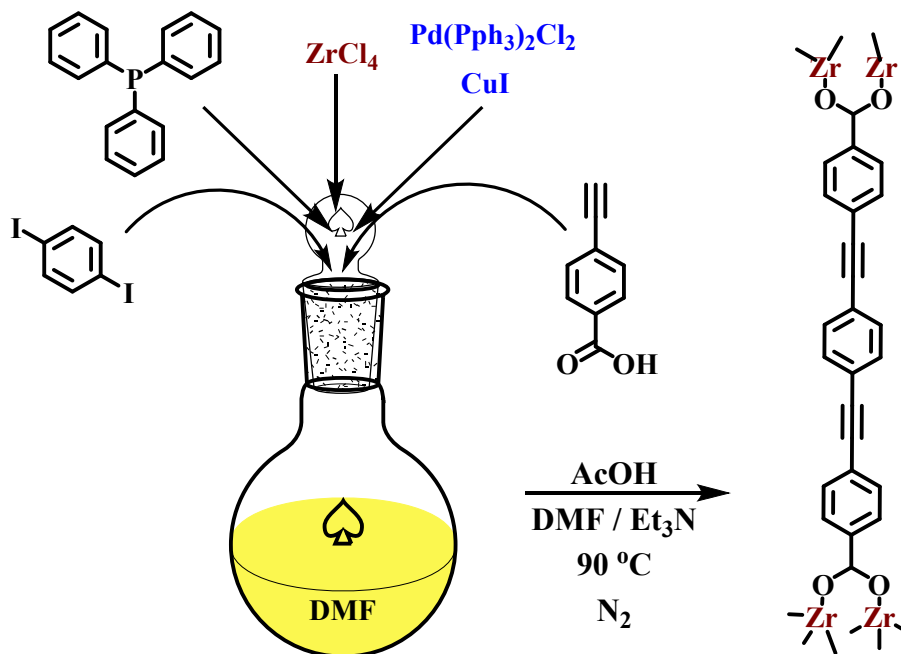

In a glass pressure vessel fitted with teflon screw cap (100 mL) charged with a magnetic stirrer a solution of  $\text{ZrCl}_4$  (0.25 mmol, 0.0583 g) in DMF (10 mL) was prepared and to this solution was added **glacial acetic acid** (0.1 mL, 1.66 mmol). After brief stirring at room temperature was then added  $\text{Et}_3\text{N}$  (2 mL), and the vessel was capped with silicon septum, and the solution was degassed through three freeze-pump-thaw cycles and backfilled with nitrogen. To this solution and under nitrogen atmosphere was added **4-ethynylbenzoic acid** (0.5 mmol, 0.073 g), **1,4-diiodobenzene** (0.23 mmol, 0.075 g), **bis-(triphenylphosphine) palladium(II) dichloride** (0.014 mmol, 10 mg),  $\text{CuI}$  (0.04 mmol, 5 mg) and **triphenylphosphine** (0.02 mmol, 5 mg) and the flask was then evacuated/backfilled with nitrogen and sealed and the mixture was stirred at  $90^\circ\text{C}$  for 24 hours to result in yellow-colored precipitate. The reaction vessel was then cooled to room temperature, opened to air and the solid filtered through a fritted funnel, washed with DMF/Acetone/MeOH and kept under Acetone for guest exchange for one week prior to gas sorption measurements. Activation for gas sorption included evacuation under dynamic vacuum at  $120^\circ\text{C}$  for 6 hours. Total dry weight of the product was 0.0927 g, 81.5% yield based on the sum of masses for reactants excluding counterions and bromine atoms.

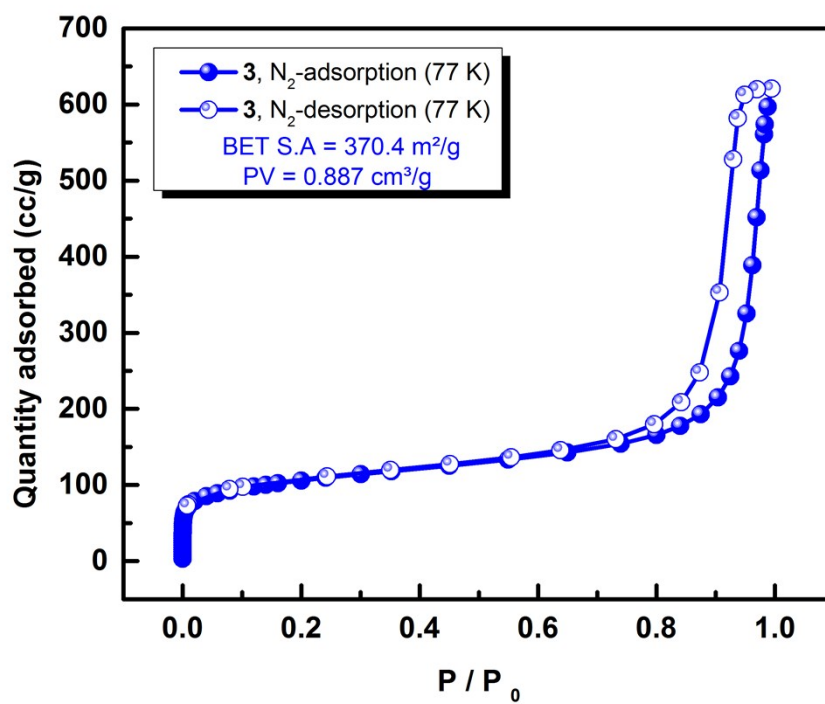

Figure S13. N<sub>2</sub> sorption isotherm of 3

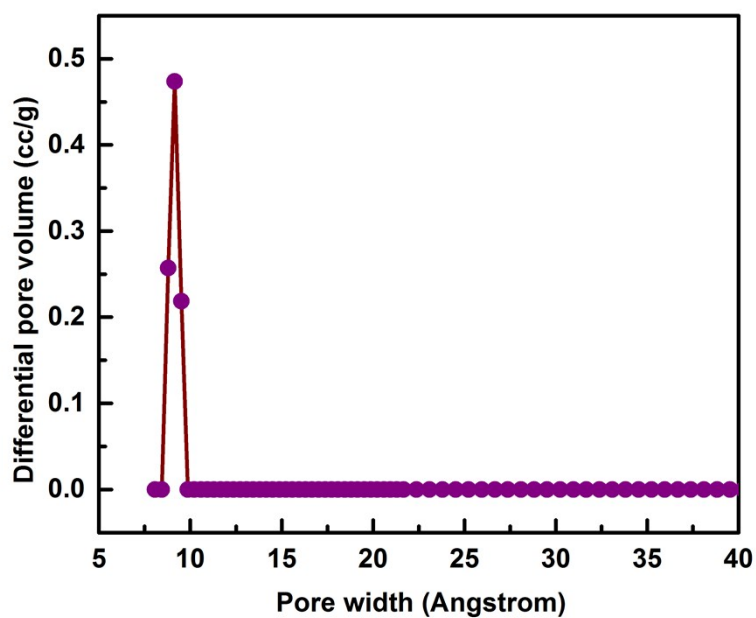

Figure S14. Pore size distribution in 3.

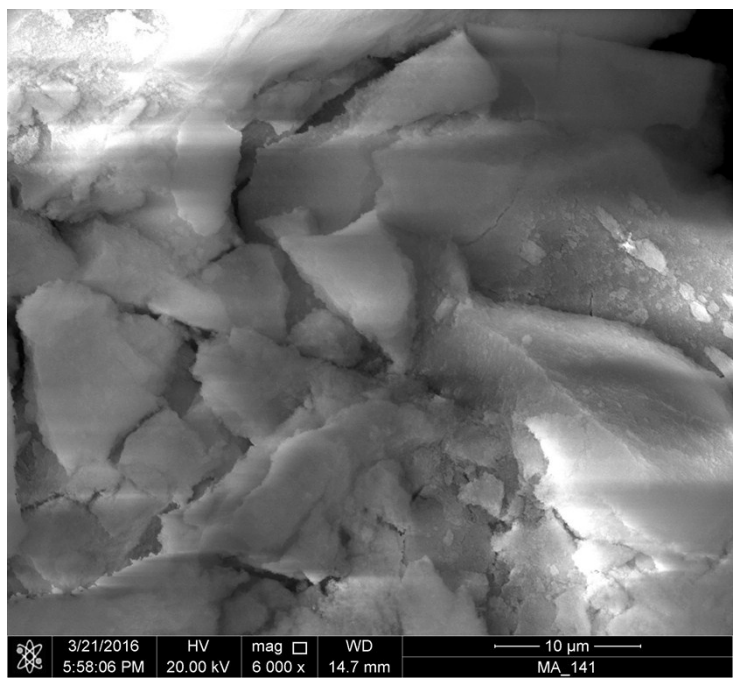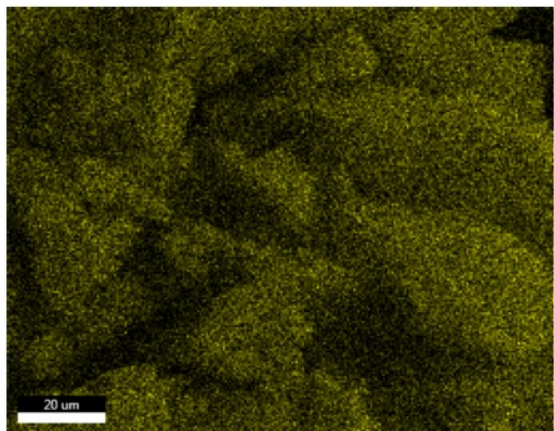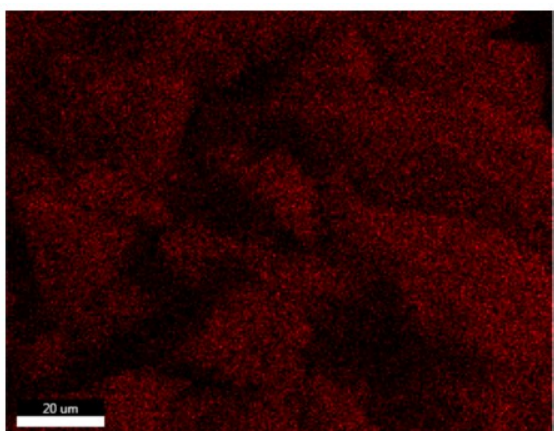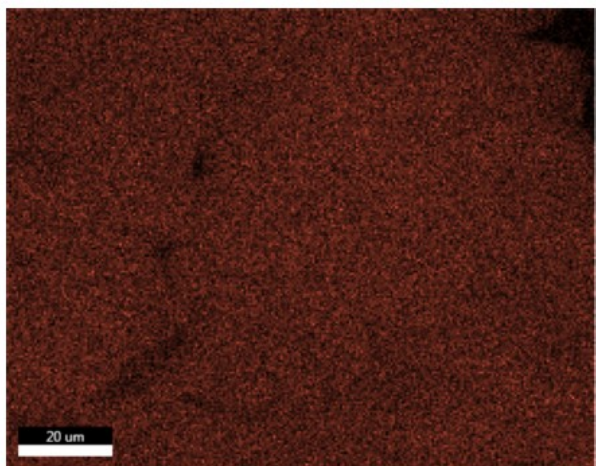

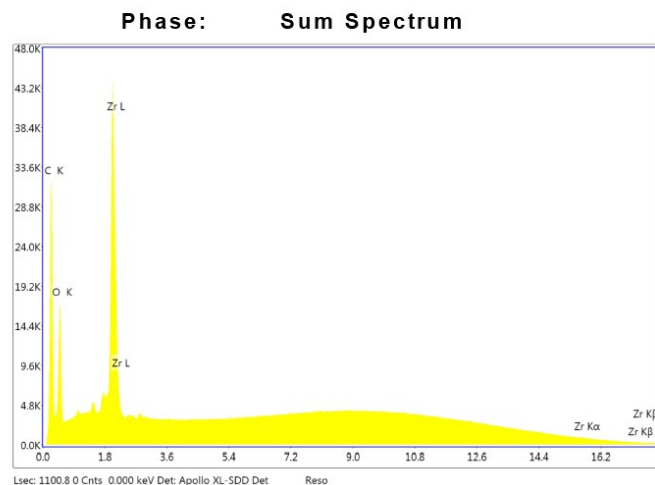

**eZAF Smart Quant Results**

| Element | Weight % | Atomic % | Net Int. | Net Int. Error |
|---------|----------|----------|----------|----------------|
| C K     | 57.6     | 72.93    | 222.2    | 0              |
| O K     | 25.52    | 24.26    | 99.9     | 0              |
| ZrL     | 16.87    | 2.81     | 348.1    | 0              |

Figure S 15 SEM image and Energy-dispersive X-ray spectroscopy (EDX) for 3 and maps showing the color coded images of the overall elemental distribution, and elemental microanalysis table.

MA\_141

MAS 20kHz  
CP with 2msec contact  
SPINAL64 decoupling @ 147kHz

Current Data Parameters  
NAME alkordi\_160125  
EXPNO 4  
PROCNO 1

F2 - Acquisition Parameters  
Date\_ 20160125  
Time 15.07 h  
INSTRUM spect  
PROBHD H134610\_0001 (   
PULPROG cp  
TD 3742  
SOLVENT MeOD  
NS 1253  
DS 0  
SWH 62500.000 Hz  
FIDRES 16.702299 Hz  
AQ 0.0299360 sec  
RG 199.22  
DM 8.000 usec  
DE 7.48 usec  
TE 0 K  
D1 2.00000000 sec  
ZGPTNS  
SFO1 125.7904823 MHz  
NUC1 13C  
P15 2000.00 usec  
PLW1 36.00000000 W  
SFO2 500.2117507 MHz  
NUC2 1H  
CNST21 1.00000000  
CPDPRG2 spinal64  
P3 1.70 usec  
PCPD2 3.40 usec  
PLW2 0 W  
PLW12 42.00000000 W  
SPNAM[0] ramp70100.100  
SFOAL0 0.500  
SPOFFS0 0 Hz  
SPW0 24.00000000 W

F2 - Processing parameters  
SI 8192  
SF 125.7779045 MHz  
WDW EN  
SSB 0  
LB 125.00 Hz  
GB 0  
PC 0.40

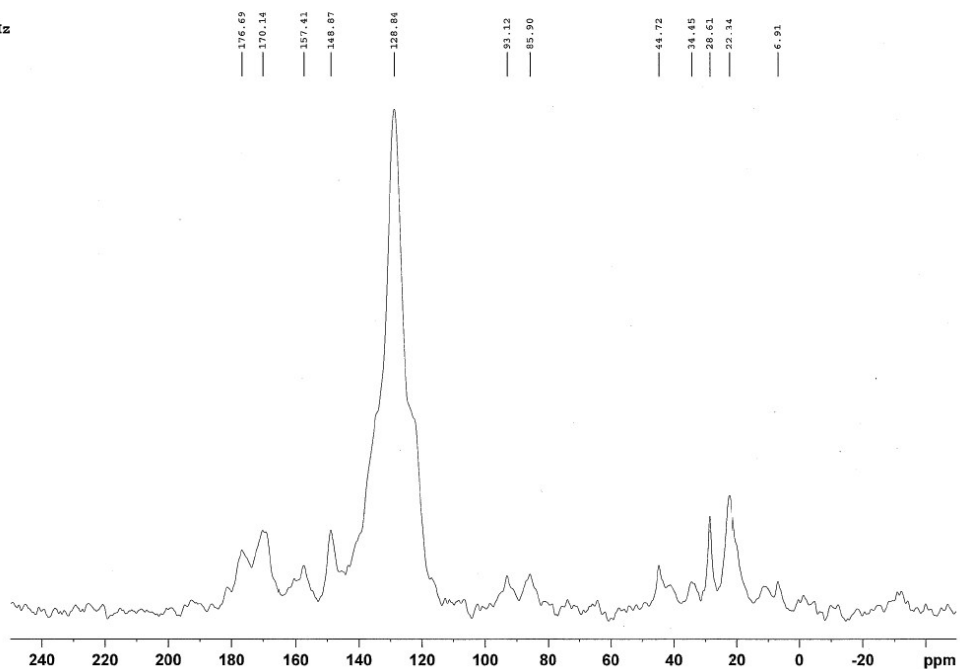

Figure S16 : <sup>13</sup>C-CPMAS NMR spectrum of 3

## Compound 4

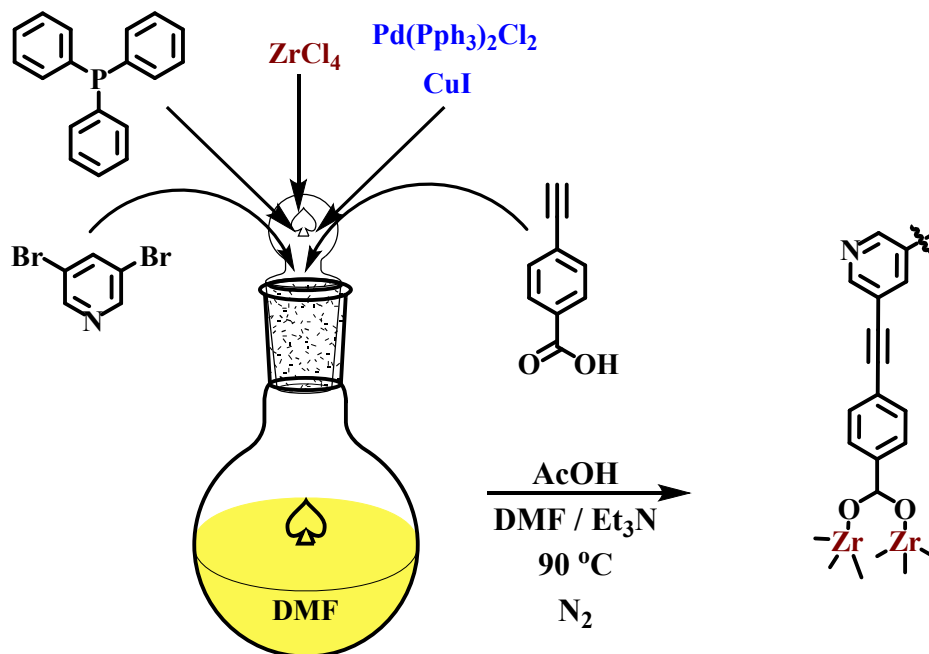

In a glass pressure vessel fitted with teflon screw cap (100 mL) charged with a magnetic stirrer a solution of  $\text{ZrCl}_4$  (0.25 mmol, 0.0583 g) in **DMF** (10 mL) was prepared and to this solution was added **glacial acetic acid** (0.1 mL, 1.66 mmol). After brief stirring at room temperature was then added  $\text{Et}_3\text{N}$  (5 mL), and the vessel was capped with silicon septum, and the solution was degassed through three freeze-pump-thaw cycles and backfilled with nitrogen. To this solution and under nitrogen atmosphere was added **4-ethynylbenzoic acid** (0.5 mmol, 0.073 g), **3,5-dibromopyridine** (0.25 mmol, 0.0545 g), **bis-(triphenylphosphine) palladium(II) dichloride** (0.014 mmol, 10 mg), **CuI** (0.04 mmol, 5 mg) and **triphenylphosphine** (0.02 mmol, 5 mg) and the flask was then evacuated/backfilled with nitrogen and sealed and the mixture was stirred at  $90\text{ }^\circ\text{C}$  for 24 h to result in yellow-colored precipitate. The reaction vessel was then cooled to room temperature, opened to air and the solid filtered through a fritted funnel, washed with Water/DCM/DMF/Acetone and kept under Acetonitrile for guest exchange for one week prior to gas sorption measurements. Activation for gas sorption included evacuation under dynamic vacuum at  $120\text{ }^\circ\text{C}$  for 6 hours. Total dry weight of the product was 0.0577 g, 50% yield based on the sum of masses for reactants excluding counterions and bromine atoms.

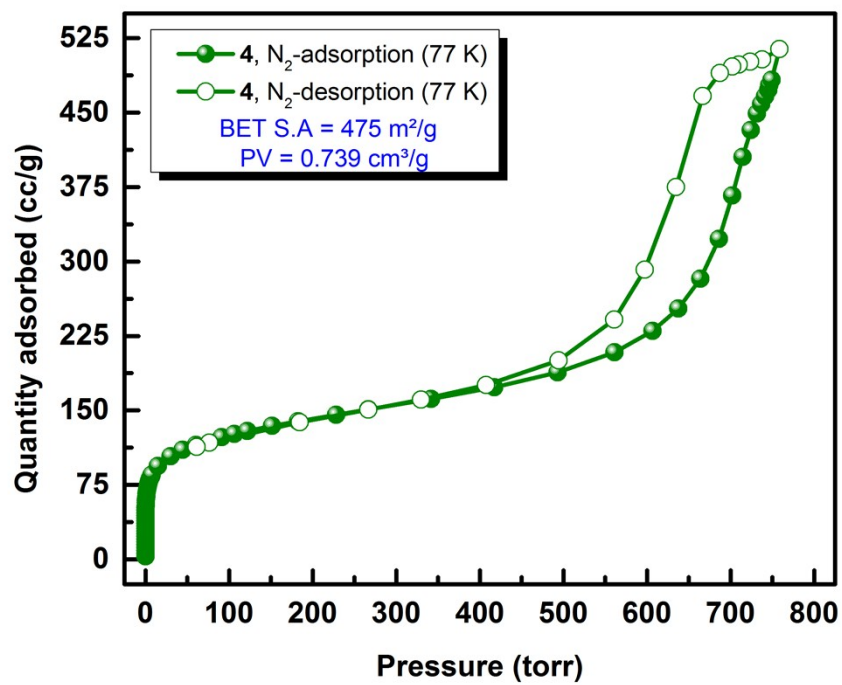

Figure S17:  $N_2$  gas sorption isotherms in 4.

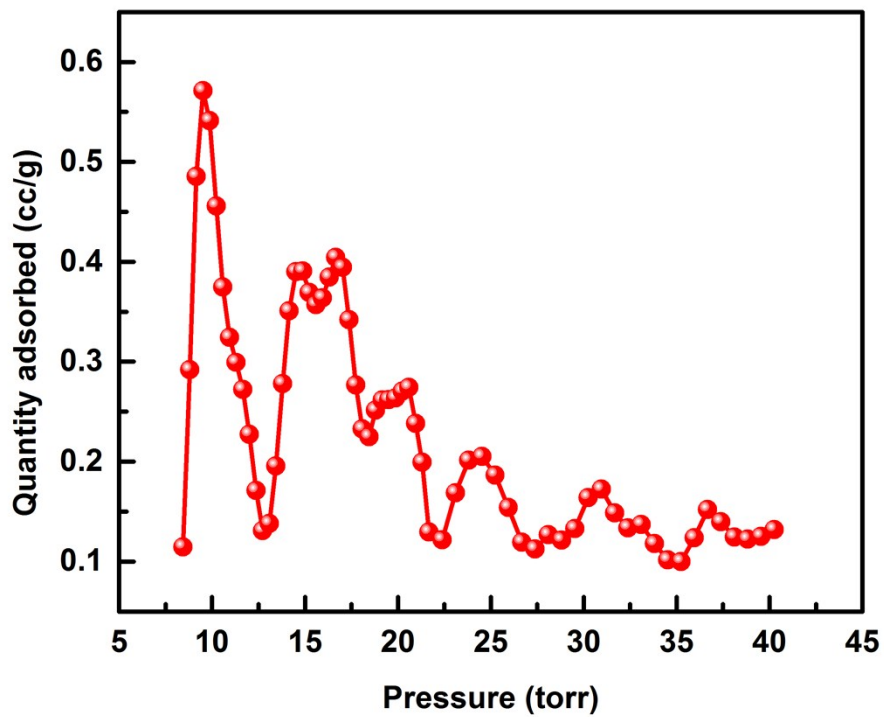

Figure S18. Pore size distribution in 4.

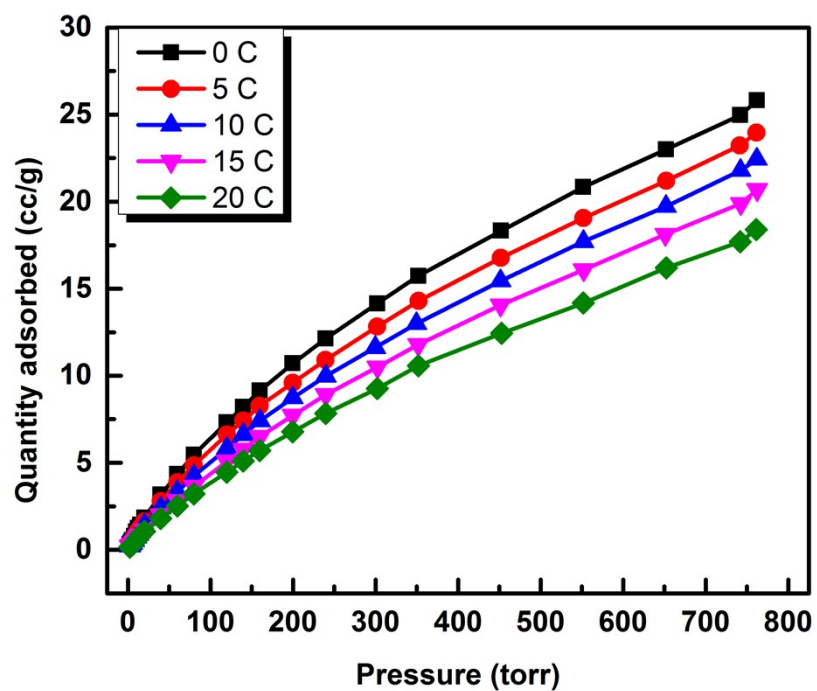

Figure S19. Variable temperature CO<sub>2</sub> isotherms in 4.

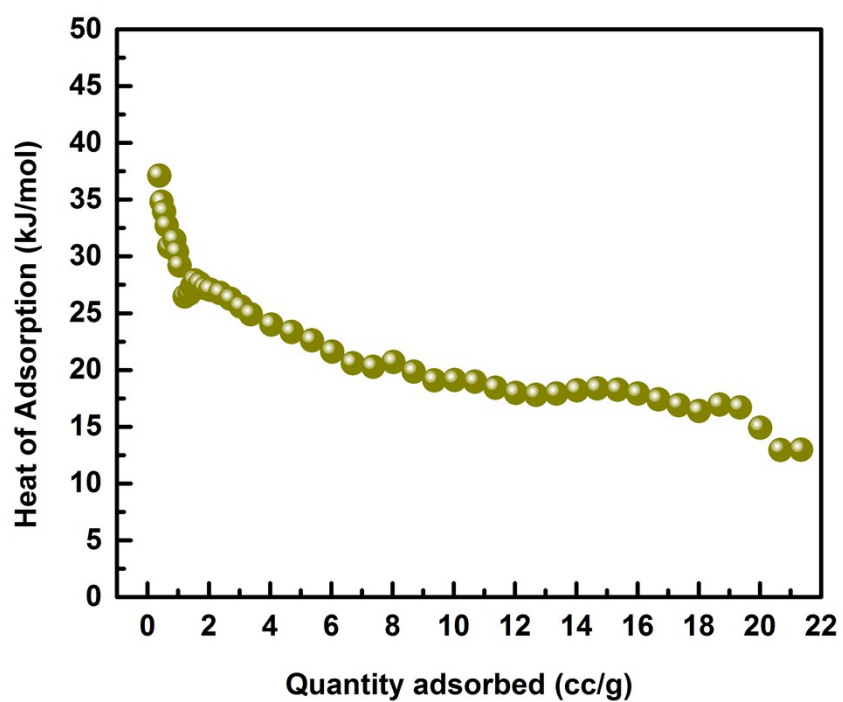

Figure S20. Isosteric heat of adsorption for CO<sub>2</sub> in 4.

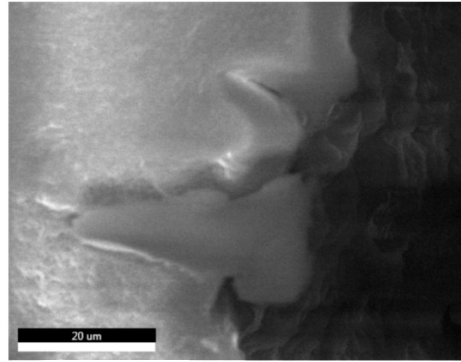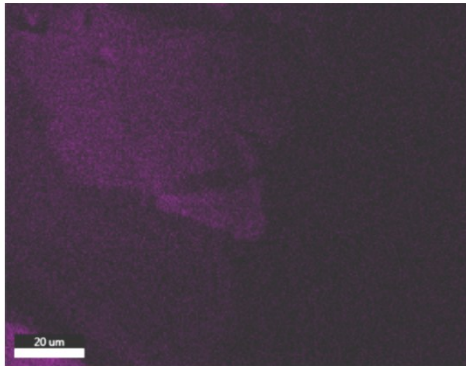

C K

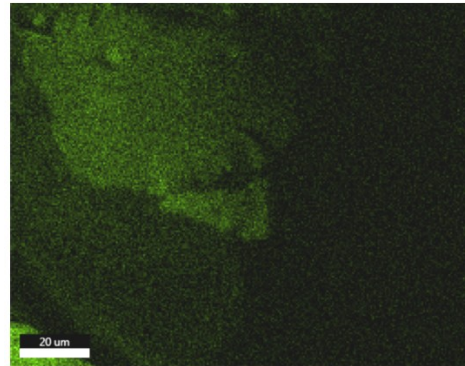

O K

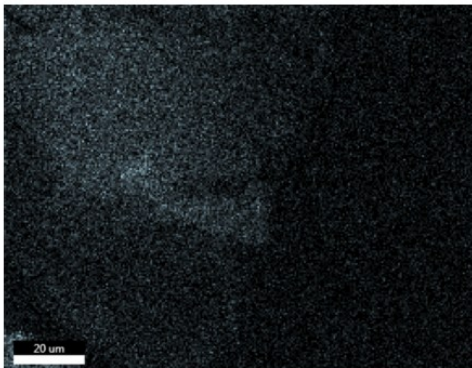

Br L

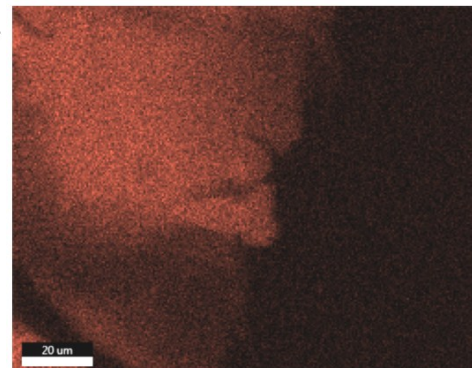

Zr L

**Phase:      Sum Spectrum**

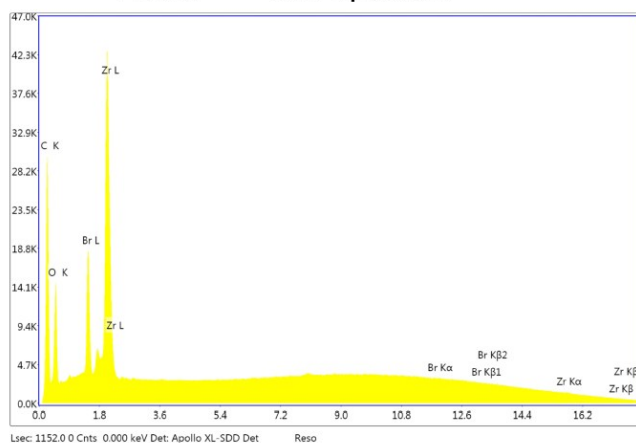

**eZAF Smart Quant Results**

| Element | Weight % | Atomic % | Net Int. | Net Int. Error |
|---------|----------|----------|----------|----------------|
| C K     | 54.27    | 70.01    | 226.4    | 0              |
| O K     | 27.72    | 26.85    | 131.8    | 0              |
| BrL     | 3.49     | 0.68     | 84.6     | 0.01           |
| ZrL     | 14.51    | 2.46     | 330.8    | 0              |

SEM image and Energy-dispersive X-ray spectroscopy (EDX) for 4 and maps showing the color coded images of the overall elemental distribution, and elemental microanalysis table

MA\_131

MAS 20kHz  
CP with 2msec contact  
SPINAL64 decoupling @ 147kHz

Current Data Parameters  
NAME alkordi\_160125  
EXPNO 3  
PROCNO 1

P2 - Acquisition Parameters  
Date\_ 20160125  
Time 14.23 h  
INSTRUM spect  
PROBHD H134610\_0001 ( cp  
PULPROG TD 3742  
SOLVENT MeOD  
NS 1031  
DS 0  
SWH 62500.000 Hz  
FIDRES 16.702299 Hz  
AQ 0.0299360 sec  
RG 199.22  
DW 8.000 usec  
DE 7.48 usec  
TE 0 K  
D1 2.00000000 sec  
ZGPGTNS  
SFO1 125.7904823 MHz  
NUC1 13C  
P15 2000.00 usec  
PLW1 36.00000000 W  
SFO2 500.2117507 MHz  
NUC2 1H  
CNST21 1.00000000  
CPDPRG2 spinal64  
P3 1.70 usec  
PCPD2 3.40 usec  
PLW2 0 W  
PLW12 42.00000000 W  
SPHAW[0] ramp70100.100  
SFOALG 0.500  
SPOFFS0 0 Hz  
SPW0 24.00000000 W

P2 - Processing parameters  
SI 8192  
SF 125.7779045 MHz  
WDW EM  
SSB 0  
LB 125.00 Hz  
GB 0  
PC 0.40

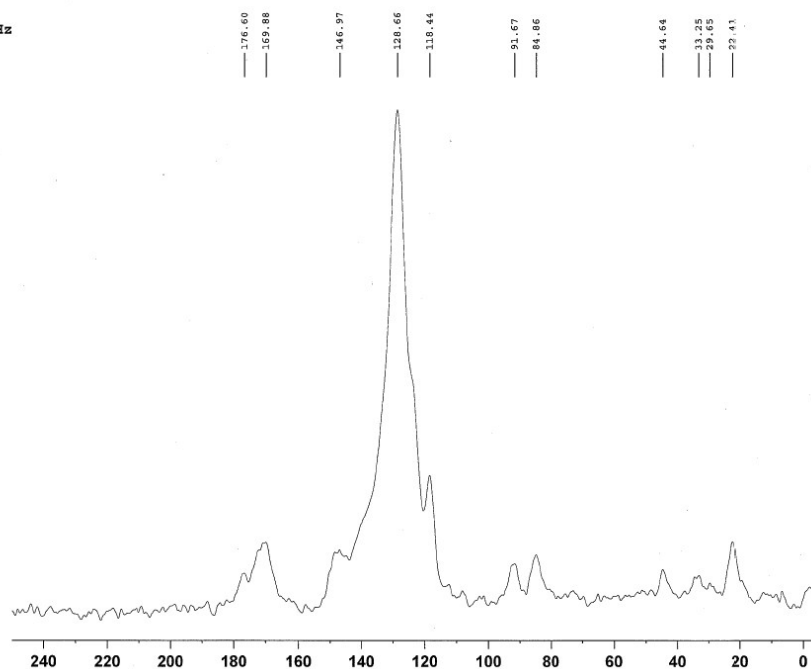

Figure S21 : <sup>13</sup>C-CPMAS NMR spectrum of 4

## Compound 5

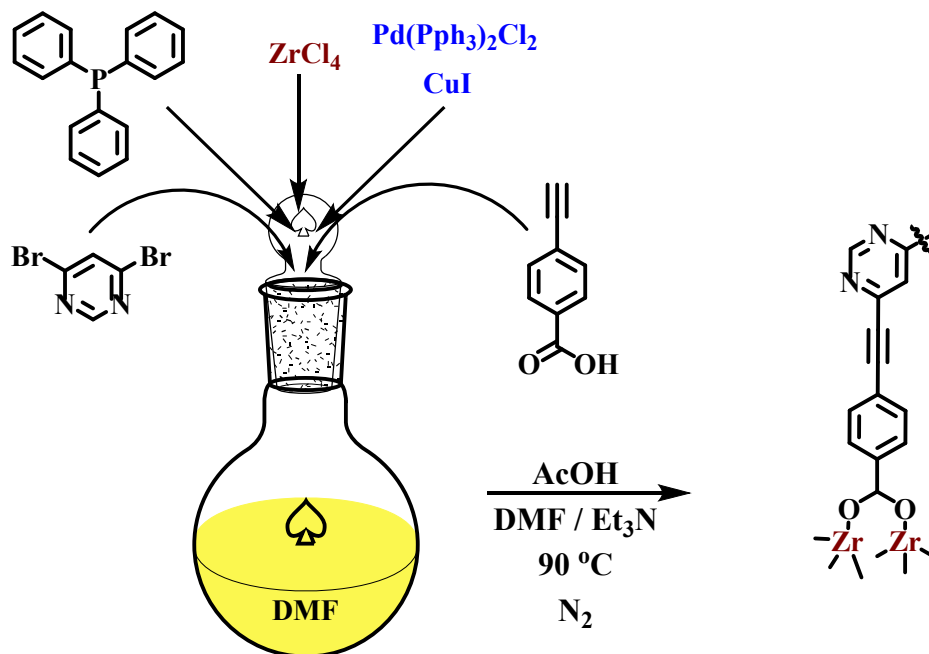

In a glass pressure vessel fitted with teflon screw cap (100 mL) charged with a magnetic stirrer a solution of  $\text{ZrCl}_4$  (0.25 mmol, 0.0583 g) in  $\text{DMF}$  (10 mL) was prepared and to this solution was added **glacial acetic acid** (0.1 mL, 1.66 mmol). After brief stirring at room temperature was then added  $\text{Et}_3\text{N}$  (5 mL), and the vessel was capped with silicon septum, and the solution was degassed through three freeze-pump-thaw cycles and backfilled with nitrogen. To this solution and under nitrogen atmosphere was added **4-ethynylbenzoic acid** (0.5 mmol, 0.073 g), **3,5-dibromopyrimidine** (0.23 mmol, 0.055 g), **bis-(triphenylphosphine) palladium(II) dichloride** (0.014 mmol, 10 mg),  $\text{CuI}$  (0.04 mmol, 5 mg) and **triphenylphosphine** (0.02 mmol, 5 mg) and the flask was then evacuated/backfilled with nitrogen and sealed and the mixture was stirred at  $90\text{ }^\circ\text{C}$  for 24 h to result in yellow-colored precipitate. The reaction vessel was then cooled to room temperature, opened to air and the solid filtered through a fritted funnel, washed with Water/DCM/DMF/Acetone and kept under Acetonitrile for guest exchange for one week prior to gas sorption measurements. Activation for gas sorption included evacuation under dynamic vacuum at  $120\text{ }^\circ\text{C}$  for 6 hours. Total dry weight of the product was 0.105 g, 93% yield based on the sum of masses for reactants excluding counterions and bromine atoms.

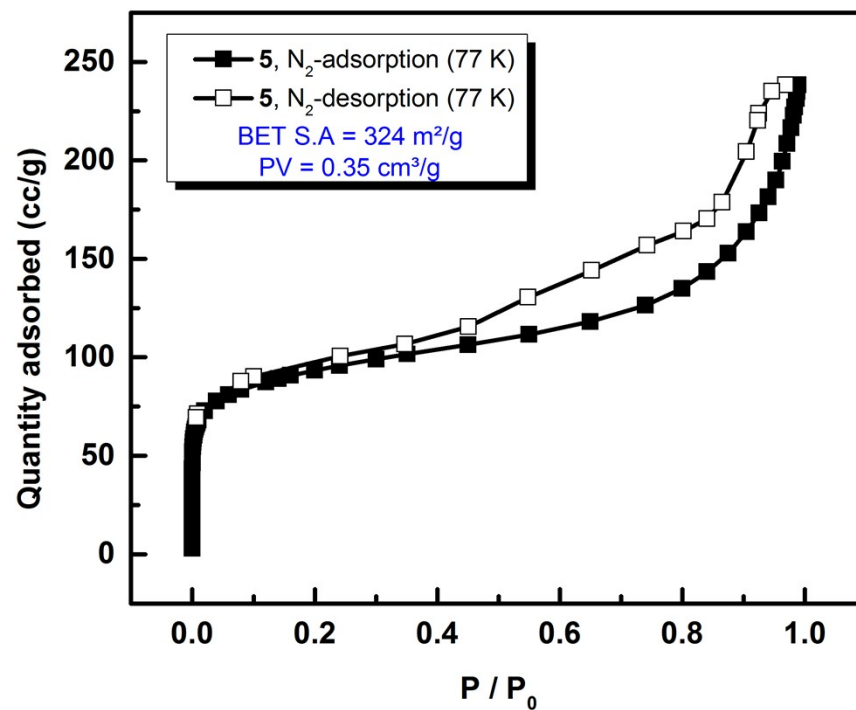

Figure S22:  $N_2$  gas sorption isotherms in 5.

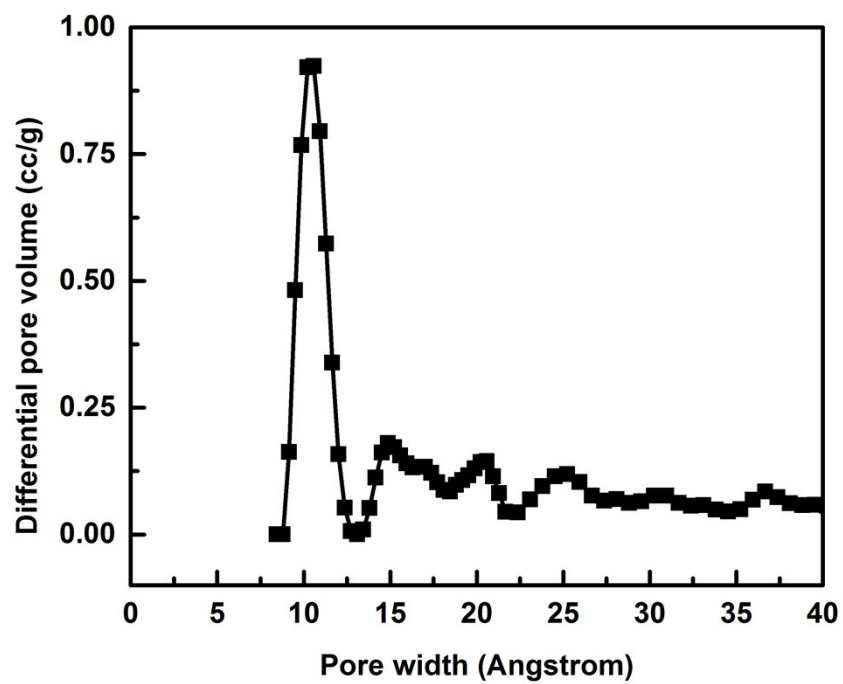

Figure S23. Pore size distribution in 5.

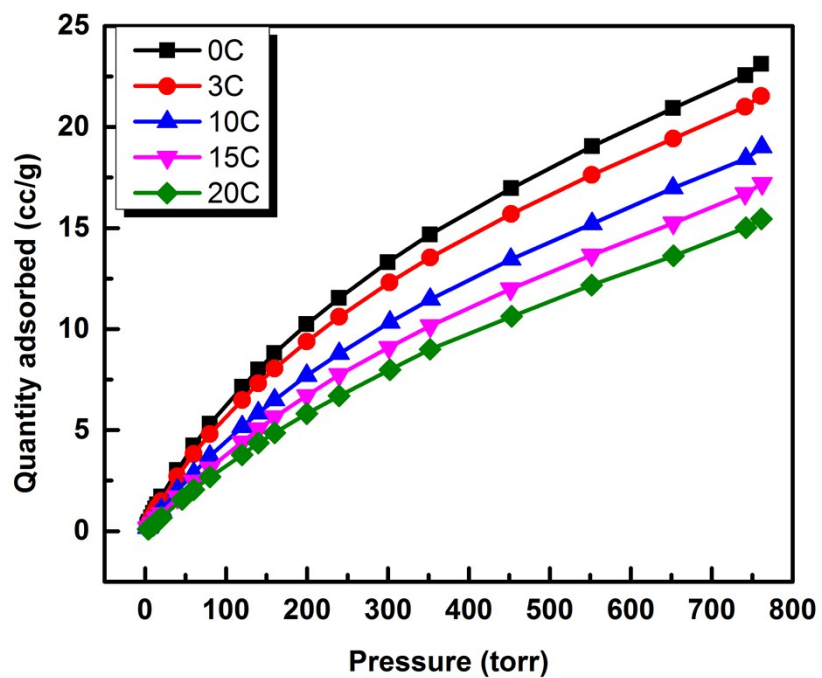

Figure S24. Variable temperature CO<sub>2</sub> isotherms in 5.

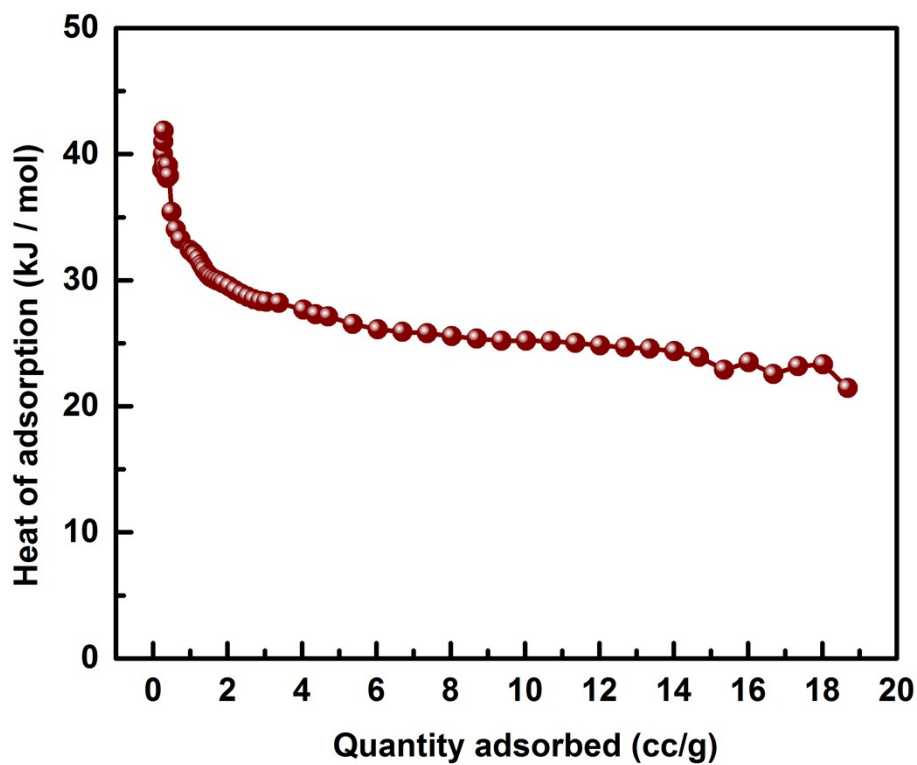

Figure S25. Isosteric heat of adsorption for CO<sub>2</sub> in 5.

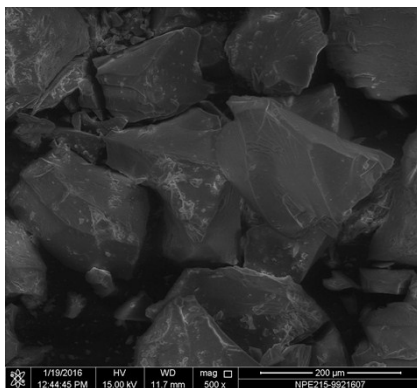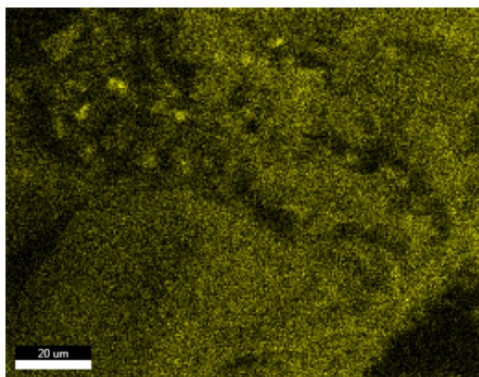

C K

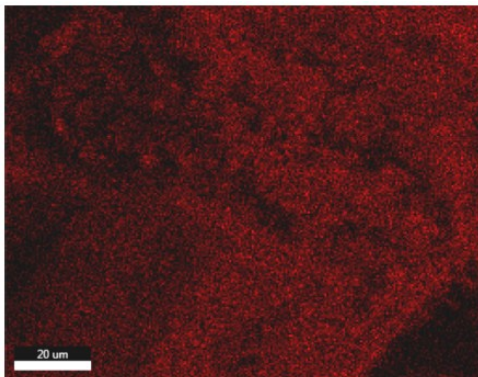

O K

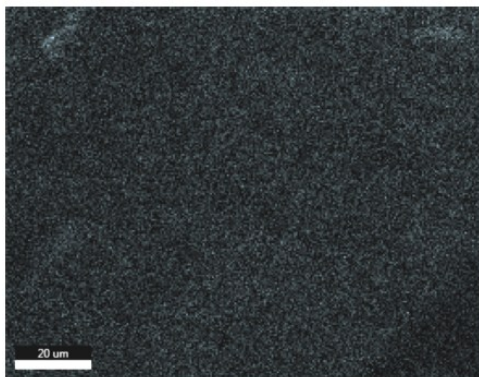

Br L

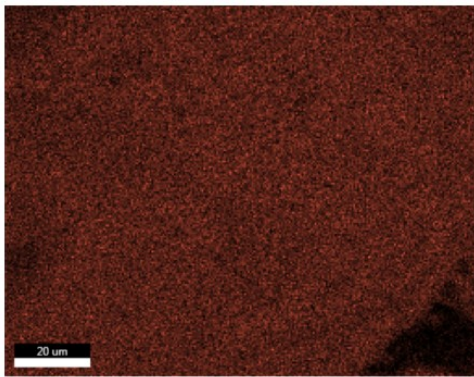

Zr L

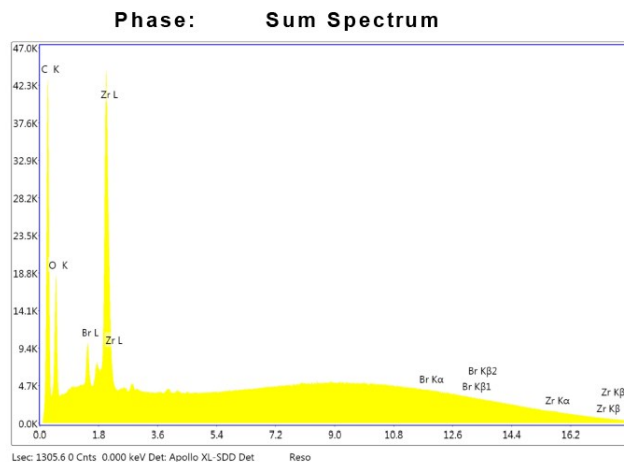

**eZAF Smart Quant Results**

| Element | Weight % | Atomic % | Net Int. | Net Int. Error |
|---------|----------|----------|----------|----------------|
| C K     | 61.05    | 75.43    | 258.6    | 0              |
| O K     | 23.81    | 22.09    | 94.2     | 0              |
| Br L    | 1.11     | 0.21     | 24.4     | 0.01           |
| Zr L    | 14.03    | 2.28     | 295.9    | 0              |

Figure S 26: SEM image and Energy-dispersive X-ray spectroscopy (EDX) for 5 and maps showing the color coded images of the overall elemental distribution, and elemental microanalysis table

MA\_140

MAS 20kHz  
CP with 2msec contact  
SPINAL64 decoupling @ 147kHz

Current Data Parameters  
NAME alkordi\_160125  
EXPNO 5  
PROCNO 1

F2 - Acquisition Parameters  
Date 20160125  
Time 16.29 h  
INSTRUM spect  
PROBHD H134610\_0001 (CP  
PULPROG cp  
TD 3742  
SOLVENT MeOD  
NS 1225  
DS 0  
SWH 62500.000 Hz  
FIDRES 16.702299 Hz  
AQ 0.0299360 sec  
RG 199.22  
DW 8.000 usec  
DE 7.48 usec  
TE 0 K  
D1 2.00000000 sec  
ZGPGTNS  
SFO1 125.7904823 MHz  
NUC1 13C  
P15 2000.00 usec  
PLW1 36.00000000 W  
SFO2 500.2117507 MHz  
NUC2 1H  
CNST21 1.00000000  
CPDPRG[2] spinal64  
P3 1.70 usec  
PCPD2 3.40 usec  
PLW2 0 W  
PLW12 42.00000000 W  
SPNAM[0] ramp70100.100  
SFOAL0 0.500  
SPOFFS0 0 Hz  
SFW0 24.00000000 W  
F2 - Processing parameters  
SI 8192  
SF 125.7779045 MHz  
WDW EM  
SSB 0  
LB 125.00 Hz  
GB 0  
PC 0.40

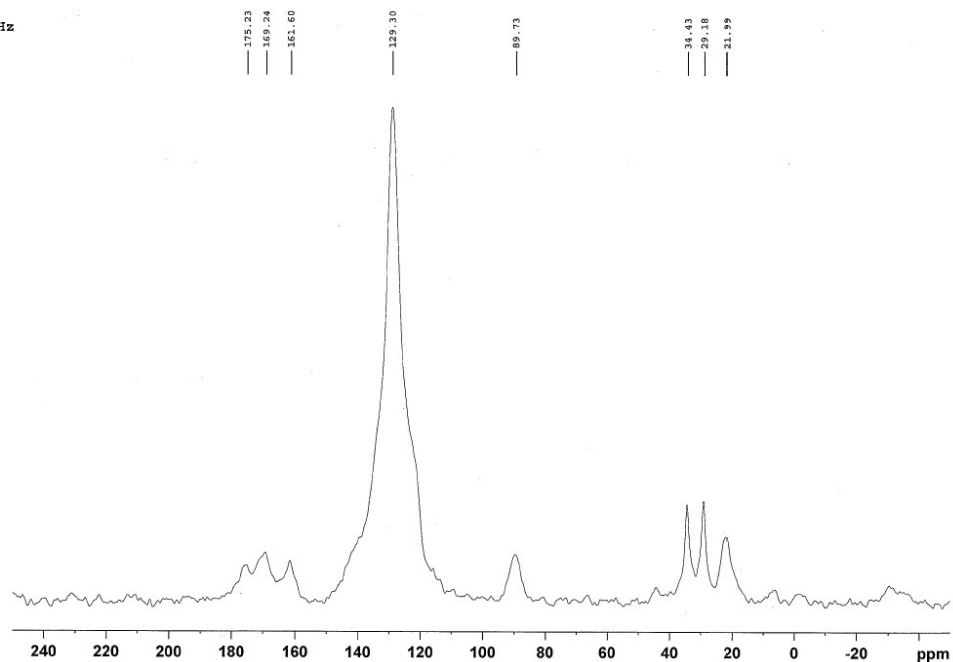

Figure S27 : 13C-CPMAS NMR spectrum of 5

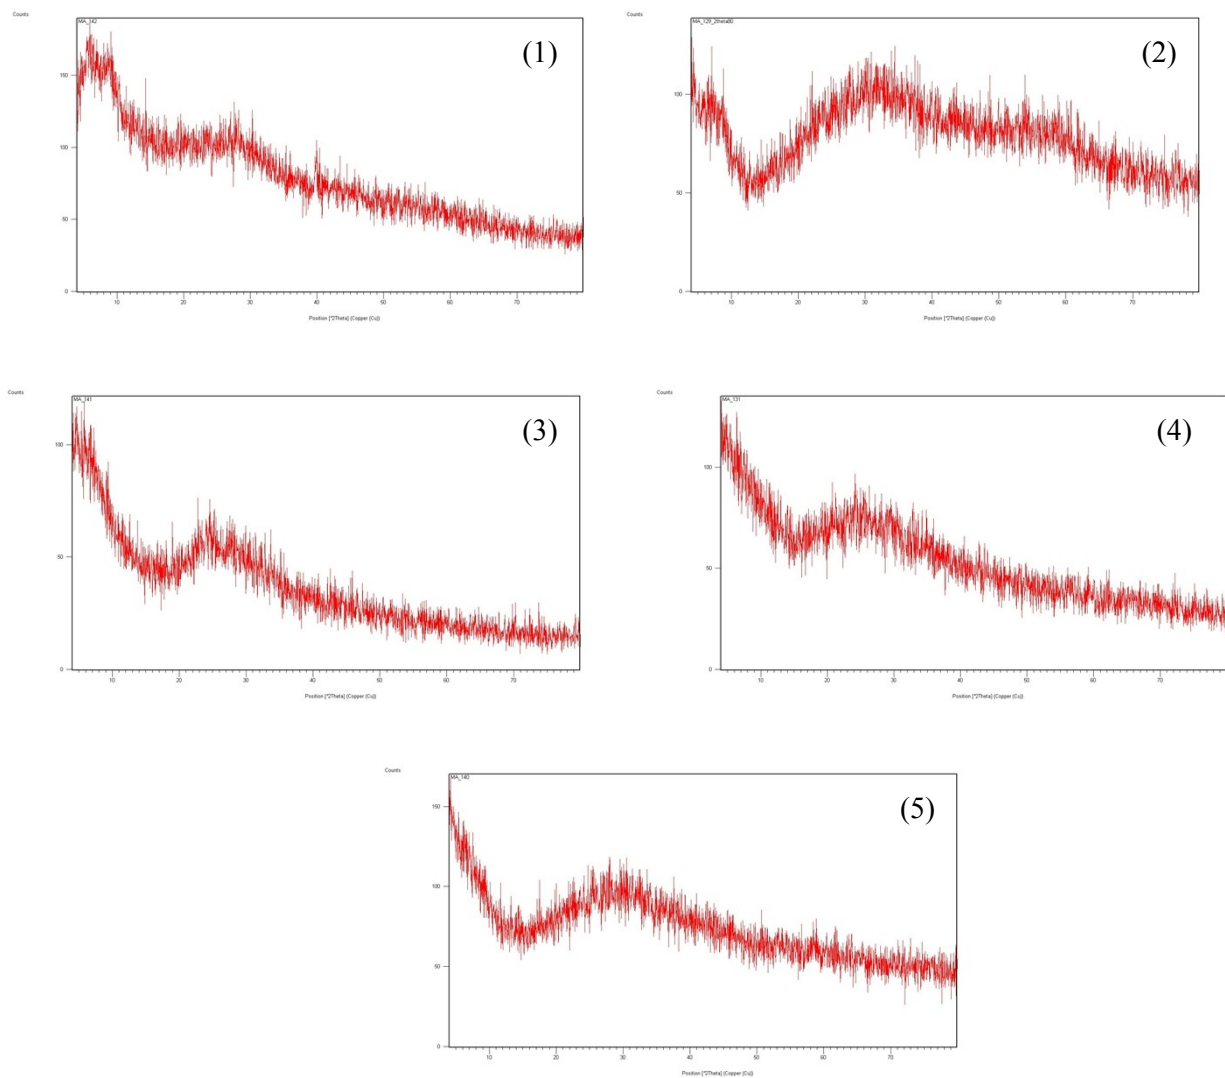

Figure S28: X-ray powder diffraction patterns for compounds 1-5.
